# Supplementary material for: Synthesizing non-natural parts from natural genomic template
Source: Springer Nature journal article supplement (doi:10.1186/1754-1611-3-2), 2009-01-01
Supplement: Additional file 1 [file 1754-1611-3-2-s1.pdf]

## EKA protein sequences – red color indicates genomic insert

### EKA1 protein sequence (genomic insert + vector sequence)

MGSDKIIHLTDDSFDTDVLKADGAILVDFWAHWC GPCCKMIAPILDEIADEYQGKLTV  
AKLNIDHNPGTAPKYGIRGIPTLLLFKNGEVAATKVGALSKGQLKEFLDANLAGSGS  
GDDDDKLGIDPFTTFHTPTIQRRNQLSILHQTLPSLRLLLALLANPTGRASSSLKVS  
LSLTLSSVSILRVPVIIITITIEFKRSPA WLFWRMREDFQPDTD

### EKA2 protein sequence (genomic insert + vector sequence)

MGSDKIIHLTDDSFDTDVLKADGAILVDFWAHWC GPCCKMIAPILDEIADEYQGKLTV  
AKLNIDHNPGTAPKYGIRGIPTLLLFKNGEVAATKVGALSKGQLKEFLDANLAGSGS  
GDDDDKLGIDPFTKRVS RQOGIILRF SHTFHTPTIQRRNQLSILHQTLPSLRLLLAL  
LAKGELKLEGKPIP NPLLGLDSTRTGHHHHH

### EKA3 protein sequence (genomic insert + vector sequence)

MGSDKIIHLTDDSFDTDVLKADGAILVDFWAHWC GPCCKMIAPILDEIADEYQGKLTV  
AKLNIDHNPGTAPKYGIRGIPTLLLFKNGEVAATKVGALSKGQLKEFLDANLAGSGS  
GDDDDKLGIDPFTVGSRLLS DATLCVLS DLQFSAPRRPDKSRQRRIRHRLSDATLCV  
LSDLQFSAPRRPDKSRQRRIRHRLSDATLCVLS DLQFSAPRRPDKSRQRRIRHRLSD  
ATPSVLS DLQFSAPRRPDKSRQRRIRHRLSNTINGRFLFHLATKGELKLEGKPIP N  
PLLGLDSTRTGHHHHH

### EKA4 protein sequence (genomic insert + vector sequence)

MGSDKIIHLTDDSFDTDVLKADGAILVDFWAHWC GPCCKMIAPILDEIADEYQGKLTV  
AKLNIDHNPGTAPKYGIRGIPTLLLFKNGEVAATKVGALSKGQLKEFLDANLAGSGS  
GDDDDKLGIDPFTVKRKPSSTGARMMLRKILYSAGESTLSPWTRRITMKGELKLEGK  
PIP NPLLGLDSTRTGHHHHH

### EKA5 protein sequence (genomic insert + vector sequence)

MGSDKIIHLTDDSFDTDVLKADGAILVDFWAHWC GPCCKMIAPILDEIADEYQGKLTV  
AKLNIDHNPGTAPKYGIRGIPTLLLFKNGEVAATKVGALSKGQLKEFLDANLAGSGS  
GDDDDKLGIDPFTTRHLYASVNPVRIASVVLGTALNDRYDNANYRRCPTIDRSRKT  
V KAPKGELKLEGKPIP NPLLGLDSTRTGHHHHH

### EKA6 protein sequence (genomic insert + vector sequence)

MGSDKIIHLTDDSFDTDVLKADGAILVDFWAHWC GPCCKMIAPILDEIADEYQGKLTV  
AKLNIDHNPGTAPKYGIRGIPTLLLFKNGEVAATKVGALSKGQLKEFLDANLAGSGS  
GDDDDKLGIDPFTHTPTIQRRNQLSILHQTLPSLRLLLALLANPTKGELKLEGKPIP  
NPLLGLDSTRTGHHHHH
